# Supplementary material
Source: publisher site journal article supplement (https://www.dovepress.com/article/282728)
Supplement: Supplementary file 1 [file get_supplementary_file.php]

**Supplementary data**

**Section 1**

**Differential Item Functioning for Workload Items by Gender, Education and Health Literacy**

A base model (model 1) posits that only the trait level predicts responses. A second model (model 2) has both trait level and group as independent variables. If model 2 predicts item responses statistically significantly better than model 1 (ie, McFadden pseudo *R2* change () ≥ 0.02), then there is uniform DIF. In uniform DIF, DIF has a consistent impact across trait levels. If the model that includes an interaction term between trait and group (model 3) fits significantly better than model 2 (ie, McFadden pseudo *R2* change () ≥ 0.02), then the impact of DIF varies by trait level (nonuniform DIF). If model 3 fits significantly better than model 1 (ie, McFadden pseudo *R2* change () ≥ 0.02), there is overall or total DIF. Analyses of workload items by gender, education, and health literacy appear below in Supplementary Tables A1, A2, and A3.

**Supplementary Table A1** Differential item functioning for workload items by gender

|  | McFadden pseudo *R2* change () | McFadden pseudo *R2* change () | McFadden pseudo *R2* change () |
| --- | --- | --- | --- |
| Over the past 4 weeks, how easy or difficult has it been for you to learn about your health problem(s)? | 0.0013 | 0.0000 | 0.0014 |
| Over the past 4 weeks, how easy or difficult has it been for you to learn what foods you should eat to stay healthy? | 0.0007 | 0.0000 | 0.0008 |
| Over the past 4 weeks, how easy or difficult has it been for you to find information on the medications that you have to take? | 0.0024 | 0.0000 | 0.0024 |
| Over the past 4 weeks, how easy or difficult has it been for you to understand any changes to your treatment plan? | 0.0001 | 0.0008 | 0.0008 |
| Over the past 4 weeks, how easy or difficult has it been for you to understand the reasons why you are taking some medicines? | 0.0022 | 0.0002 | 0.0024 |
| Over the past 4 weeks, how easy or difficult has it been for you to find sources of medical information that you trust? | 0.0007 | 0.0058 | 0.0065 |
| Over the past 4 weeks, how easy or difficult has it been for you to understand advice from different healthcare providers? | 0.0001 | 0.0043 | 0.0044 |
| Over the past 4 weeks, how easy or difficult has it been for you to organize your medicines? | 0.0079 | 0.0014 | 0.0093 |
| Over the past 4 weeks, how easy or difficult has it been for you to take more than one medicine every day? | 0.0099 | 0.0004 | 0.0103 |
| Over the past 4 weeks, how easy or difficult has it been for you to take your medicines several times each day? | 0.0008 | 0.0004 | 0.0012 |
| Over the past 4 weeks, how easy or difficult has it been for you to refill your medicines? | 0.0004 | 0.0000 | 0.0004 |
| Over the past 4 weeks, how easy or difficult has it been for you to adjust your medicines? | 0.0019 | 0.0003 | 0.0021 |
| Over the past 4 weeks, how easy or difficult has it been for you to take your medicines as directed? | 0.0004 | 0.0021 | 0.0026 |
| Over the past 4 weeks, how easy or difficult has it been for you to plan your daily activities around your medicine schedule? | 0.0002 | 0.0013 | 0.0015 |
| Over the past 4 weeks, how easy or difficult has it been for you to make or keep your medical appointments? | 0.0022 | 0.0001 | 0.0023 |
| Over the past 4 weeks, how easy or difficult has it been for you to schedule and keep track of your medical appointments? | 0.0019 | 0.0003 | 0.0022 |
| Over the past 4 weeks, how easy or difficult has it been for you to make or keep appointments with different healthcare providers? | 0.0005 | 0.0012 | 0.0018 |
| Over the past 4 weeks, how easy or difficult has it been for you to find the time to get to your medical appointments? | 0.0052 | 0.0005 | 0.0057 |
| Over the past 4 weeks, how easy or difficult has it been for you to find the energy to get to your medical appointments? | 0.0035 | 0.0001 | 0.0036 |
| Over the past 4 weeks, how easy or difficult has it been for you to find transportation to get you to your medical appointments? | 0.0001 | 0.0002 | 0.0002 |
| Over the past 4 weeks, how easy or difficult has it been for you to monitor your health behaviors, for example, tracking your exercise, the foods you eat, or medicines you take? | 0.0017 | 0.0006 | 0.0023 |
| Over the past 4 weeks, how easy or difficult has it been for you to monitor your health condition, for example, weighing yourself, checking your blood pressure, or checking your blood sugar? | 0.0000 | 0.0006 | 0.0006 |

**Supplementary Table A2** Differential item functioning for workload items by education

|  | McFadden pseudo *R2* change () | McFadden pseudo *R2* change () | McFadden pseudo *R2* change () |
| --- | --- | --- | --- |
| Over the past 4 weeks, how easy or difficult has it been for you to learn about your health problem(s)? | 0.0013 | 0.0000 | 0.0013 |
| Over the past 4 weeks, how easy or difficult has it been for you to learn what foods you should eat to stay healthy? | 0.0072 | 0.0004 | 0.0076 |
| Over the past 4 weeks, how easy or difficult has it been for you to find information on the medications that you have to take? | 0.0005 | 0.0000 | 0.0005 |
| Over the past 4 weeks, how easy or difficult has it been for you to understand any changes to your treatment plan? | 0.0044 | 0.0010 | 0.0054 |
| Over the past 4 weeks, how easy or difficult has it been for you to understand the reasons why you are taking some medicines? | 0.0008 | 0.0005 | 0.0013 |
| Over the past 4 weeks, how easy or difficult has it been for you to find sources of medical information that you trust? | 0.0011 | 0.0005 | 0.0017 |
| Over the past 4 weeks, how easy or difficult has it been for you to understand advice from different healthcare providers? | 0.0048 | 0.0000 | 0.0048 |
| Over the past 4 weeks, how easy or difficult has it been for you to organize your medicines? | 0.0003 | 0.0030 | 0.0033 |
| Over the past 4 weeks, how easy or difficult has it been for you to take more than one medicine every day? | 0.0005 | 0.0054 | 0.0058 |
| Over the past 4 weeks, how easy or difficult has it been for you to take your medicines several times each day? | 0.0015 | 0.0012 | 0.0027 |
| Over the past 4 weeks, how easy or difficult has it been for you to refill your medicines? | 0.0022 | 0.0001 | 0.0022 |
| Over the past 4 weeks, how easy or difficult has it been for you to adjust your medicines? | 0.0000 | 0.0012 | 0.0012 |
| Over the past 4 weeks, how easy or difficult has it been for you to take your medicines as directed? | 0.0008 | 0.0001 | 0.0010 |
| Over the past 4 weeks, how easy or difficult has it been for you to plan your daily activities around your medicine schedule? | 0.0000 | 0.0002 | 0.0002 |
| Over the past 4 weeks, how easy or difficult has it been for you to make or keep your medical appointments? | 0.0040 | 0.0002 | 0.0042 |
| Over the past 4 weeks, how easy or difficult has it been for you to schedule and keep track of your medical appointments? | 0.0082 | 0.0009 | 0.0092 |
| Over the past 4 weeks, how easy or difficult has it been for you to make or keep appointments with different healthcare providers? | 0.0038 | 0.0000 | 0.0038 |
| Over the past 4 weeks, how easy or difficult has it been for you to find the time to get to your medical appointments? | 0.0039 | 0.0009 | 0.0048 |
| Over the past 4 weeks, how easy or difficult has it been for you to find the energy to get to your medical appointments? | 0.0007 | 0.0012 | 0.0019 |
| Over the past 4 weeks, how easy or difficult has it been for you to find transportation to get you to your medical appointments? | 0.0033 | 0.0000 | 0.0033 |
| Over the past 4 weeks, how easy or difficult has it been for you to monitor your health behaviors, for example, tracking your exercise, the foods you eat, or medicines you take? | 0.0011 | 0.0006 | 0.0018 |
| Over the past 4 weeks, how easy or difficult has it been for you to monitor your health condition, for example, weighing yourself, checking your blood pressure, or checking your blood sugar? | 0.0003 | 0.0016 | 0.0019 |

**Supplementary Table A3** Differential item functioning for workload items by health literacy

|  | McFadden pseudo *R2* change () | McFadden pseudo *R2* change () | McFadden pseudo *R2* change () |
| --- | --- | --- | --- |
| Over the past 4 weeks, how easy or difficult has it been for you to learn about your health problem(s)? | 0.0143 | 0.0004 | 0.0147 |
| Over the past 4 weeks, how easy or difficult has it been for you to learn what foods you should eat to stay healthy? | 0.0097 | 0.0017 | 0.0114 |
| Over the past 4 weeks, how easy or difficult has it been for you to find information on the medications that you have to take? | 0.0060 | 0.0001 | 0.0060 |
| Over the past 4 weeks, how easy or difficult has it been for you to understand any changes to your treatment plan? | 0.0201 | 0.0000 | 0.0202 |
| Over the past 4 weeks, how easy or difficult has it been for you to understand the reasons why you are taking some medicines? | 0.0028 | 0.0003 | 0.0031 |
| Over the past 4 weeks, how easy or difficult has it been for you to find sources of medical information that you trust? | 0.0055 | 0.0017 | 0.0072 |
| Over the past 4 weeks, how easy or difficult has it been for you to understand advice from different healthcare providers? | 0.0106 | 0.0019 | 0.0126 |
| Over the past 4 weeks, how easy or difficult has it been for you to organize your medicines? | 0.0013 | 0.0049 | 0.0062 |
| Over the past 4 weeks, how easy or difficult has it been for you to take more than one medicine every day? | 0.0020 | 0.0038 | 0.0058 |
| Over the past 4 weeks, how easy or difficult has it been for you to take your medicines several times each day? | 0.0006 | 0.0000 | 0.0006 |
| Over the past 4 weeks, how easy or difficult has it been for you to refill your medicines? | 0.0044 | 0.0000 | 0.0044 |
| Over the past 4 weeks, how easy or difficult has it been for you to adjust your medicines? | 0.0000 | 0.0000 | 0.0000 |
| Over the past 4 weeks, how easy or difficult has it been for you to take your medicines as directed? | 0.0001 | 0.0008 | 0.0009 |
| Over the past 4 weeks, how easy or difficult has it been for you to plan your daily activities around your medicine schedule? | 0.0006 | 0.0002 | 0.0008 |
| Over the past 4 weeks, how easy or difficult has it been for you to make or keep your medical appointments? | 0.0040 | 0.0001 | 0.0041 |
| Over the past 4 weeks, how easy or difficult has it been for you to schedule and keep track of your medical appointments? | 0.0073 | 0.0010 | 0.0082 |
| Over the past 4 weeks, how easy or difficult has it been for you to make or keep appointments with different healthcare providers? | 0.0024 | 0.0003 | 0.0027 |
| Over the past 4 weeks, how easy or difficult has it been for you to find the time to get to your medical appointments? | 0.0029 | 0.0008 | 0.0037 |
| Over the past 4 weeks, how easy or difficult has it been for you to find the energy to get to your medical appointments? | 0.0007 | 0.0000 | 0.0008 |
| Over the past 4 weeks, how easy or difficult has it been for you to find transportation to get you to your medical appointments? | 0.0004 | 0.0016 | 0.0020 |
| Over the past 4 weeks, how easy or difficult has it been for you to monitor your health behaviors, for example, tracking your exercise, the foods you eat, or medicines you take? | 0.0001 | 0.0005 | 0.0006 |
| Over the past 4 weeks, how easy or difficult has it been for you to monitor your health condition, for example, weighing yourself, checking your blood pressure, or checking your blood sugar? | 0.0000 | 0.0022 | 0.0022 |

**Section 2**

**Differential Item Functioning for Impact Items by Gender, Education and Health Literacy**

A base model (model 1) posits that only the trait level predicts responses. A second model (model 2) has both trait level and group as independent variables. If model 2 predicts item responses statistically significantly better than model 1 (ie, McFadden pseudo *R2* change () ≥ 0.02), then there is uniform DIF. In uniform DIF, DIF has a consistent impact across trait levels. If the model that includes an interaction term between trait and group (model 3) fits significantly better than model 2 (ie, McFadden pseudo *R2* change () ≥ 0.02), then the impact of DIF varies by trait level (nonuniform DIF). If model 3 fits significantly better than model 1 (ie, McFadden pseudo *R2* change () ≥ 0.02), there is overall or total DIF. Analyses of impact items by gender, education, and health literacy appear below in Supplementary Tables B1, B2, and B3.

**Supplementary Table B1** Differential item functioning for impact items by gender

|  | McFadden pseudo *R2* change () | McFadden pseudo *R2* change () | McFadden pseudo *R2* change () |
| --- | --- | --- | --- |
| In the past 4 weeks, how much has your self-management interfered with your work? | 0.0004 | 0.0005 | 0.0010 |
| In the past 4 weeks, how much has your self-management interfered with family responsibilities? | 0.0000 | 0.0001 | 0.0002 |
| In the past 4 weeks, how much has your self-management interfered with daily activities? | 0.0001 | 0.0000 | 0.0001 |
| In the past 4 weeks, how much has your self-management interfered with hobbies and leisure activities? | 0.0075 | 0.0002 | 0.0077 |
| In the past 4 weeks, how much has your self-management interfered with ability to spend time with family and friends? | 0.0021 | 0.0026 | 0.0047 |
| In the past 4 weeks, how much has your self-management interfered with ability to travel for work or vacation? | 0.0009 | 0.0004 | 0.0012 |
| In the past 4 weeks, how often did your self-management make you feel angry? | 0.0030 | 0.0007 | 0.0037 |
| In the past 4 weeks, how often did your self-management make you feel preoccupied? | 0.0005 | 0.0008 | 0.0013 |
| In the past 4 weeks, how often did your self-management make you feel depressed? | 0.0000 | 0.0000 | 0.0000 |
| In the past 4 weeks, how often did your self-management make you feel worn out? | 0.0045 | 0.0063 | 0.0108 |
| In the past 4 weeks, how often did your self-management make you feel frustrated? | 0.0002 | 0.0001 | 0.0003 |

**Supplementary Table B2** Differential item functioning for impact items by education

|  | McFadden pseudo *R2* change () | McFadden pseudo *R2* change () | McFadden pseudo *R2* change () |
| --- | --- | --- | --- |
| In the past 4 weeks, how much has your self-management interfered with your work? | 0.0028 | 0.0008 | 0.0036 |
| In the past 4 weeks, how much has your self-management interfered with family responsibilities? | 0.0000 | 0.0002 | 0.0003 |
| In the past 4 weeks, how much has your self-management interfered with daily activities? | 0.0000 | 0.0015 | 0.0015 |
| In the past 4 weeks, how much has your self-management interfered with hobbies and leisure activities? | 0.0017 | 0.0009 | 0.0026 |
| In the past 4 weeks, how much has your self-management interfered with ability to spend time with family and friends? | 0.0019 | 0.0043 | 0.0061 |
| In the past 4 weeks, how much has your self-management interfered with ability to travel for work or vacation? | 0.0024 | 0.0001 | 0.0024 |
| In the past 4 weeks, how often did your self-management make you feel angry? | 0.0021 | 0.0000 | 0.0021 |
| In the past 4 weeks, how often did your self-management make you feel preoccupied? | 0.0040 | 0.0009 | 0.0048 |
| In the past 4 weeks, how often did your self-management make you feel depressed? | 0.0014 | 0.0001 | 0.0015 |
| In the past 4 weeks, how often did your self-management make you feel worn out? | 0.0048 | 0.0010 | 0.0058 |
| In the past 4 weeks, how often did your self-management make you feel frustrated? | 0.0015 | 0.0002 | 0.0017 |

**Supplementary Table B3** Differential item functioning for impact items by health literacy

|  | McFadden pseudo *R2* change () | McFadden pseudo *R2* change () | McFadden pseudo *R2* change () |
| --- | --- | --- | --- |
| In the past 4 weeks, how much has your self-management interfered with your work? | 0.0004 | 0.0035 | 0.0040 |
| In the past 4 weeks, how much has your self-management interfered with family responsibilities? | 0.0033 | 0.0011 | 0.0043 |
| In the past 4 weeks, how much has your self-management interfered with daily activities? | 0.0001 | 0.0017 | 0.0018 |
| In the past 4 weeks, how much has your self-management interfered with hobbies and leisure activities? | 0.0030 | 0.0004 | 0.0034 |
| In the past 4 weeks, how much has your self-management interfered with ability to spend time with family and friends? | 0.0004 | 0.0018 | 0.0021 |
| In the past 4 weeks, how much has your self-management interfered with ability to travel for work or vacation? | 0.0002 | 0.0010 | 0.0012 |
| In the past 4 weeks, how often did your self-management make you feel angry? | 0.0027 | 0.0001 | 0.0027 |
| In the past 4 weeks, how often did your self-management make you feel preoccupied? | 0.0035 | 0.0073 | 0.0108 |
| In the past 4 weeks, how often did your self-management make you feel depressed? | 0.0005 | 0.0008 | 0.0013 |
| In the past 4 weeks, how often did your self-management make you feel worn out? | 0.0000 | 0.0002 | 0.0002 |
| In the past 4 weeks, how often did your self-management make you feel frustrated? | 0.0000 | 0.0005 | 0.0005 |
